# Supplementary material
Source: PubMed Central journal article supplement (PMC7375109)

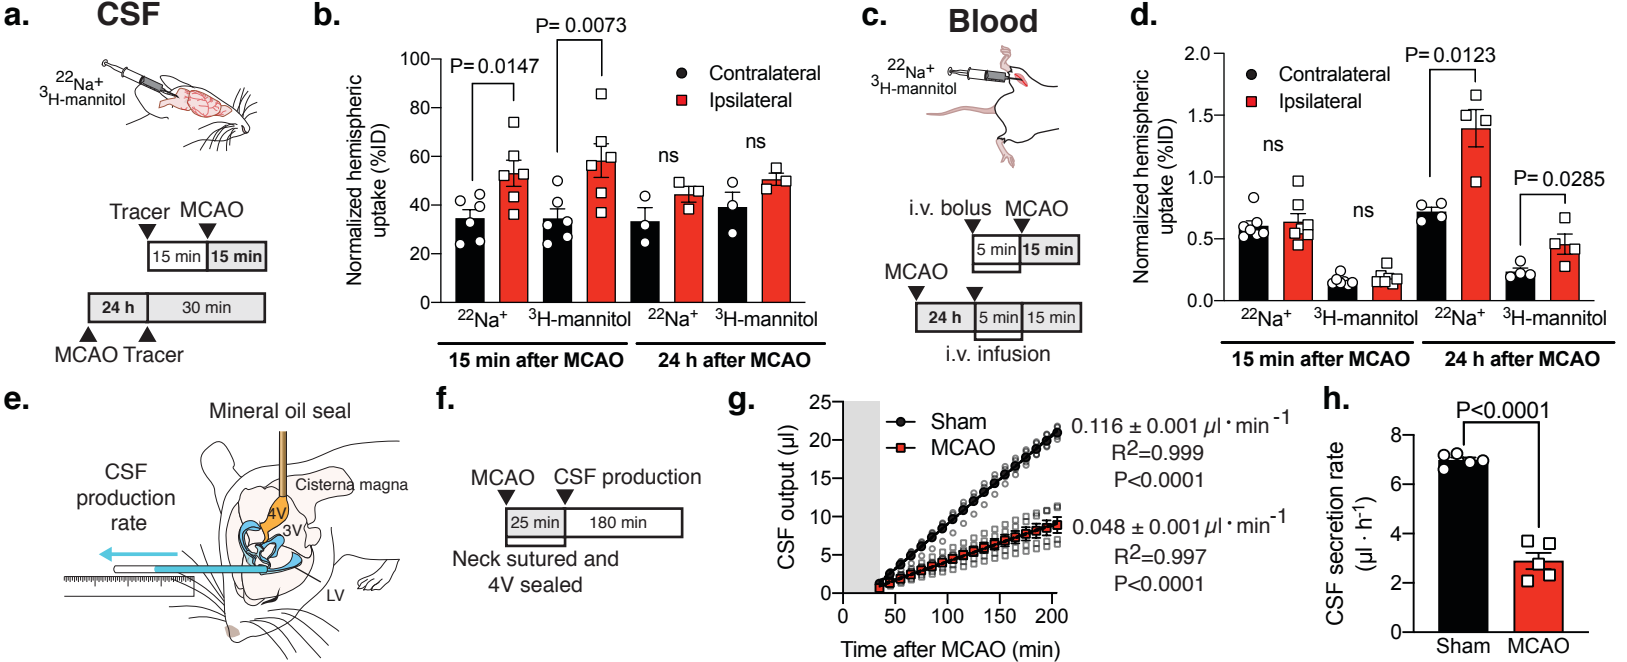

Supplement: NIHMS1599846-supplement-10.pdf [file NIHMS1599846-supplement-10.pdf]

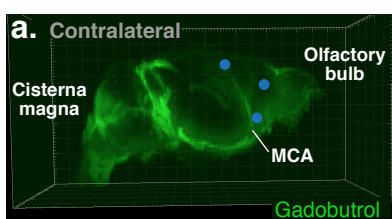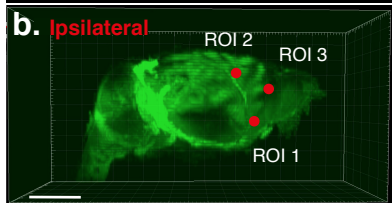

26 min after MCAO

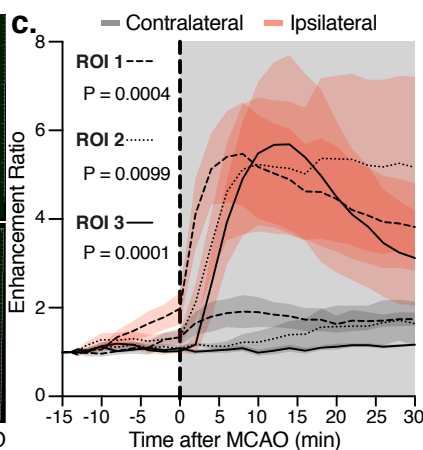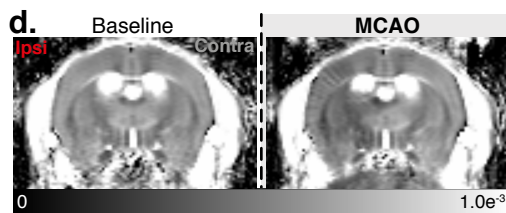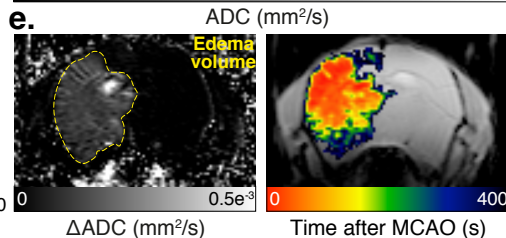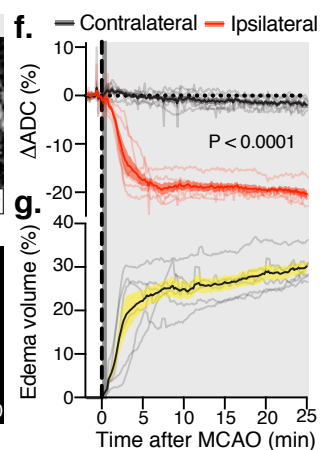

Supplement: NIHMS1599846-supplement-2.pdf [file NIHMS1599846-supplement-2.pdf]

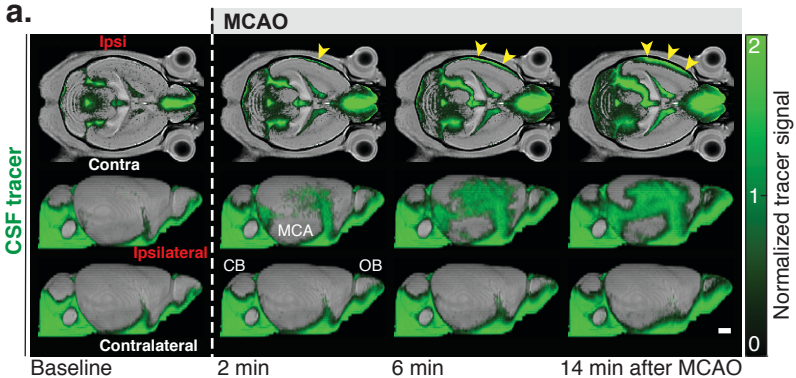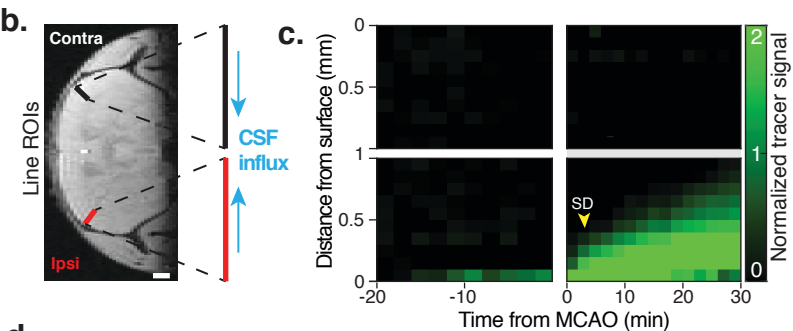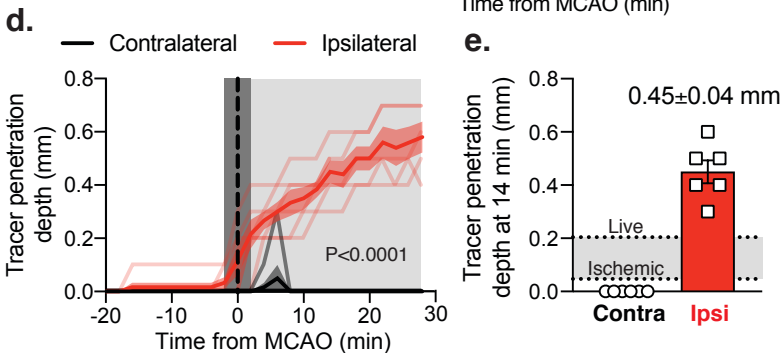

Supplement: NIHMS1599846-supplement-3.pdf [file NIHMS1599846-supplement-3.pdf]

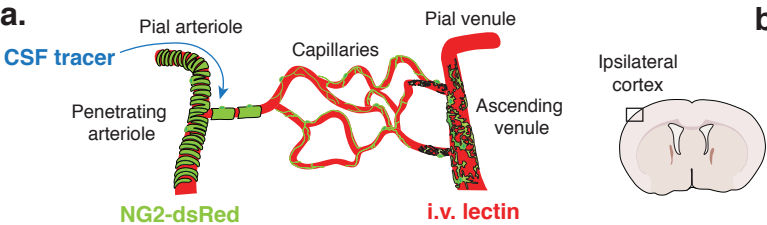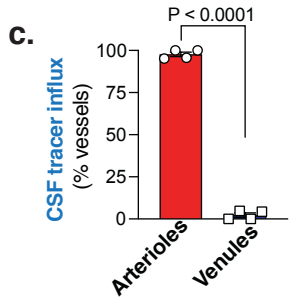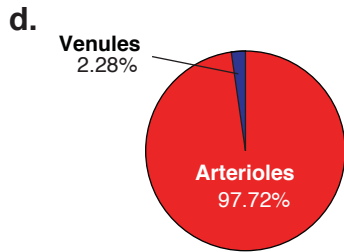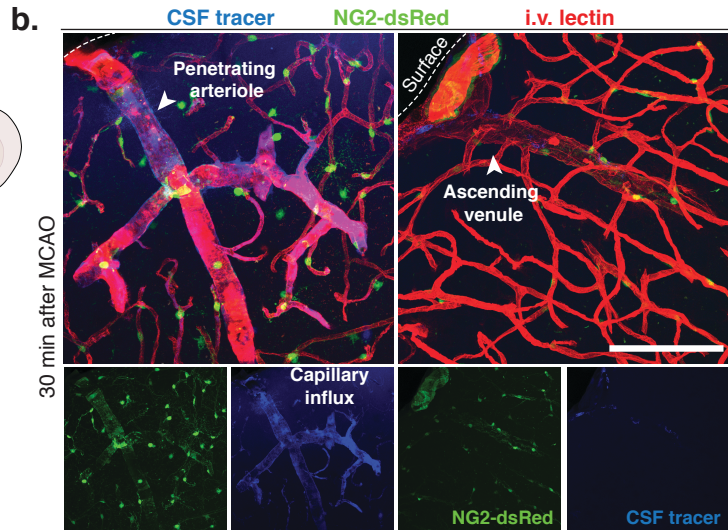

Supplement: NIHMS1599846-supplement-4.pdf [file NIHMS1599846-supplement-4.pdf]

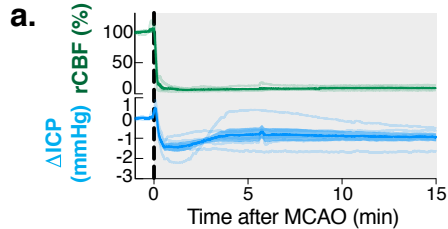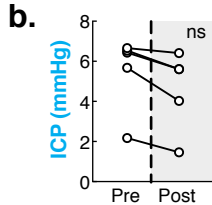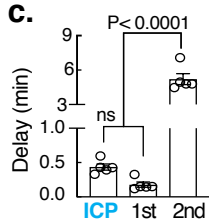

Supplement: NIHMS1599846-supplement-5.pdf [file NIHMS1599846-supplement-5.pdf]

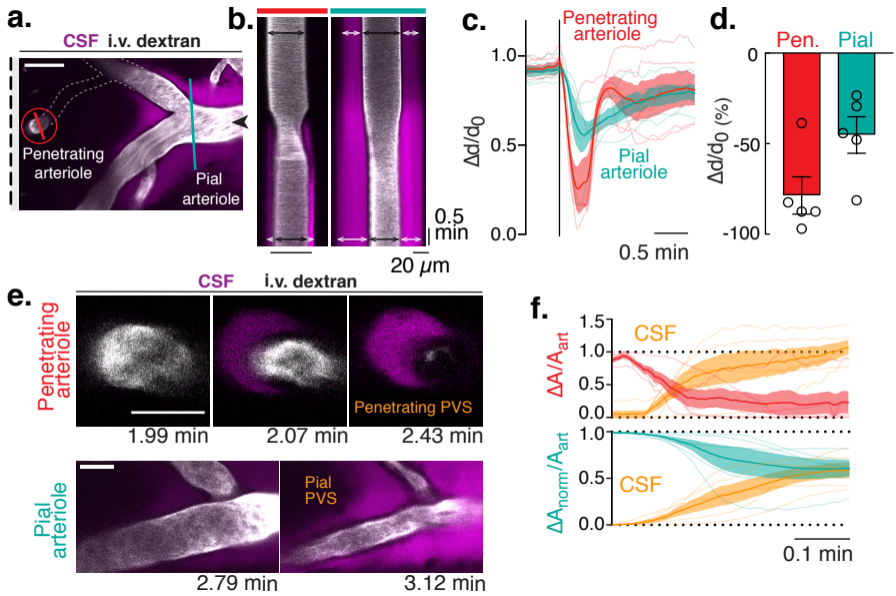

Supplement: NIHMS1599846-supplement-6.pdf [file NIHMS1599846-supplement-6.pdf]

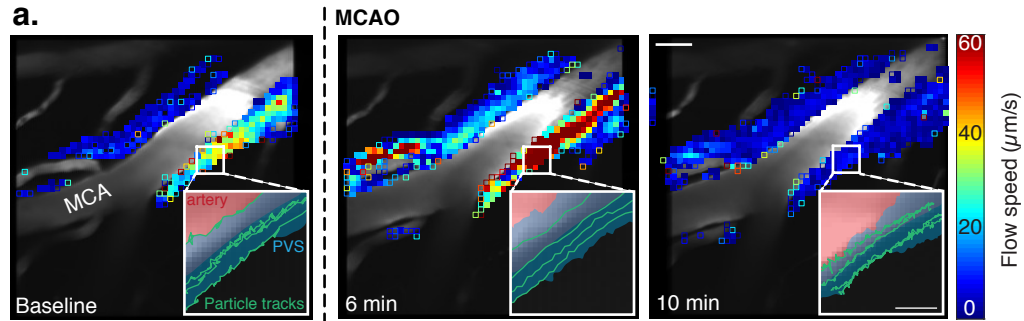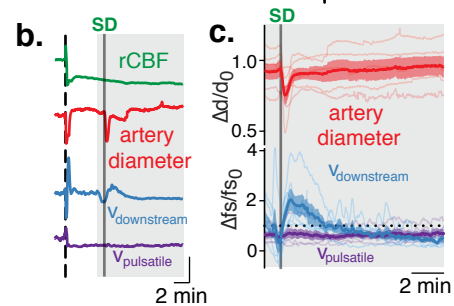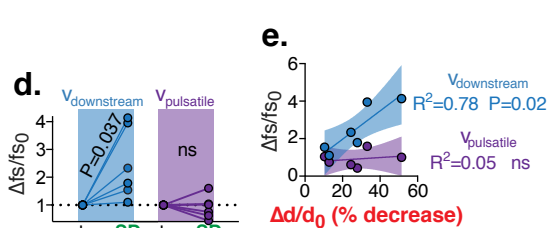

Supplement: NIHMS1599846-supplement-7.pdf [file NIHMS1599846-supplement-7.pdf]

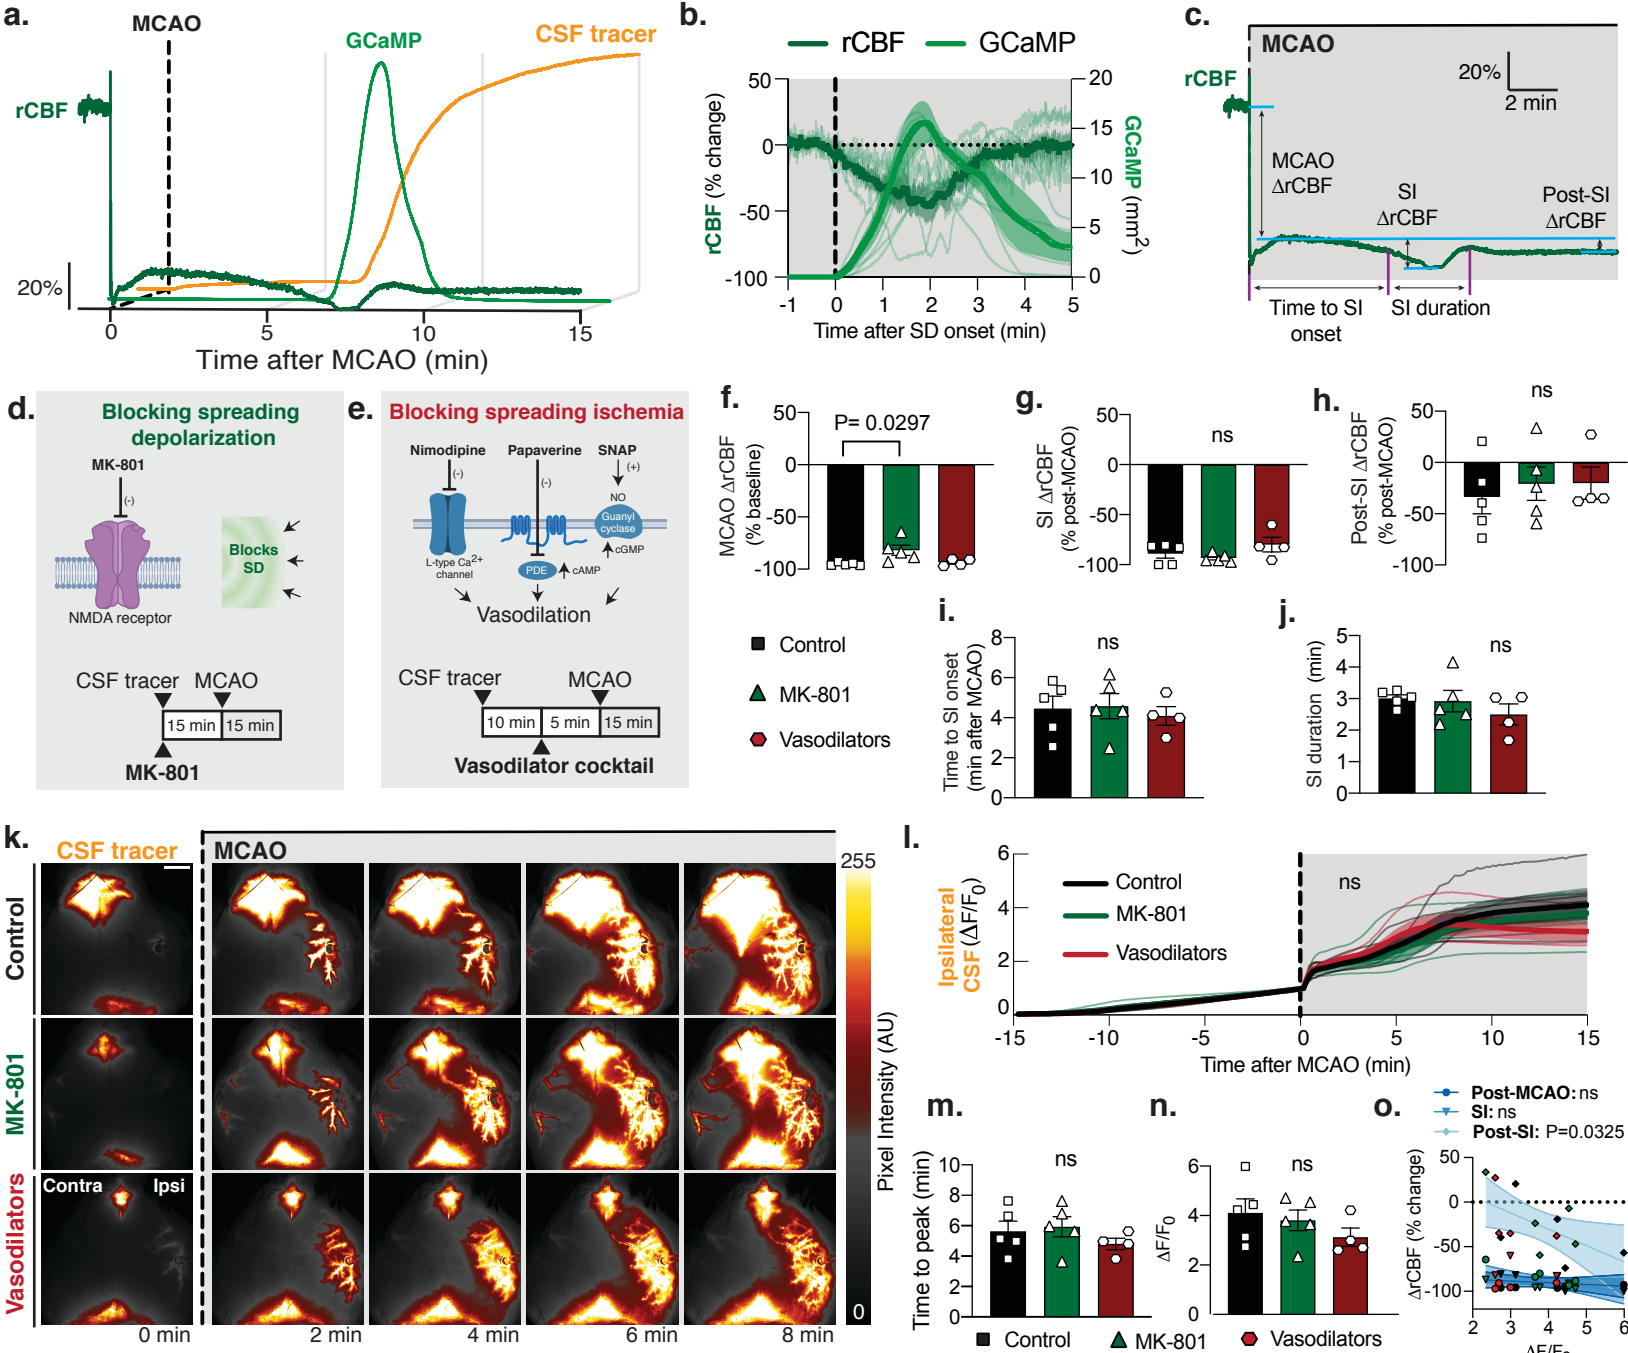

Supplement: NIHMS1599846-supplement-8.pdf [file NIHMS1599846-supplement-8.pdf]

# a. Mouse

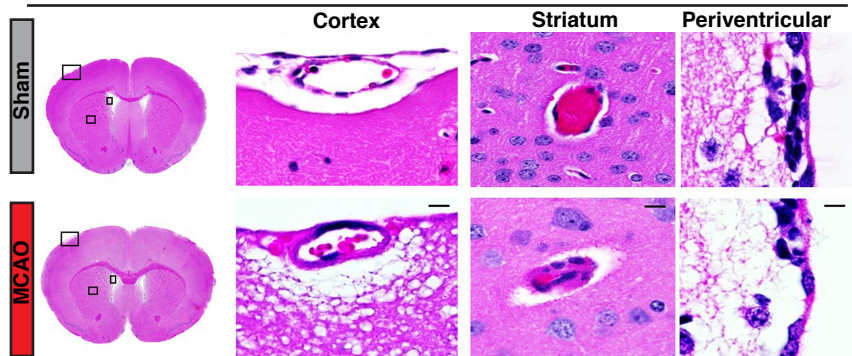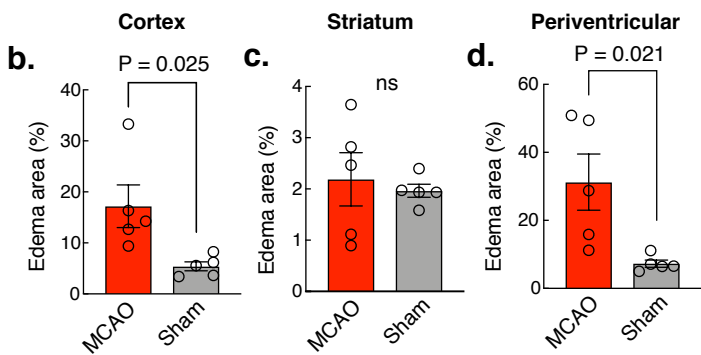

# e. Human

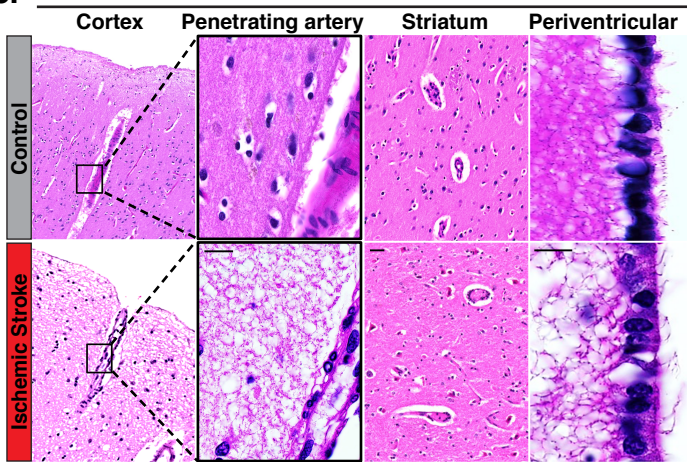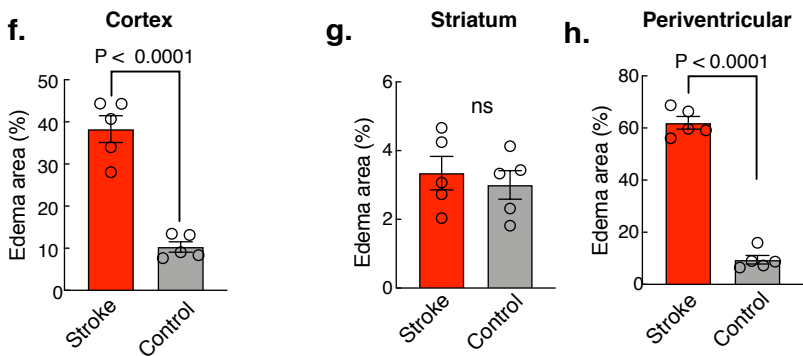

Supplement: NIHMS1599846-supplement-9.pdf [file NIHMS1599846-supplement-9.pdf]

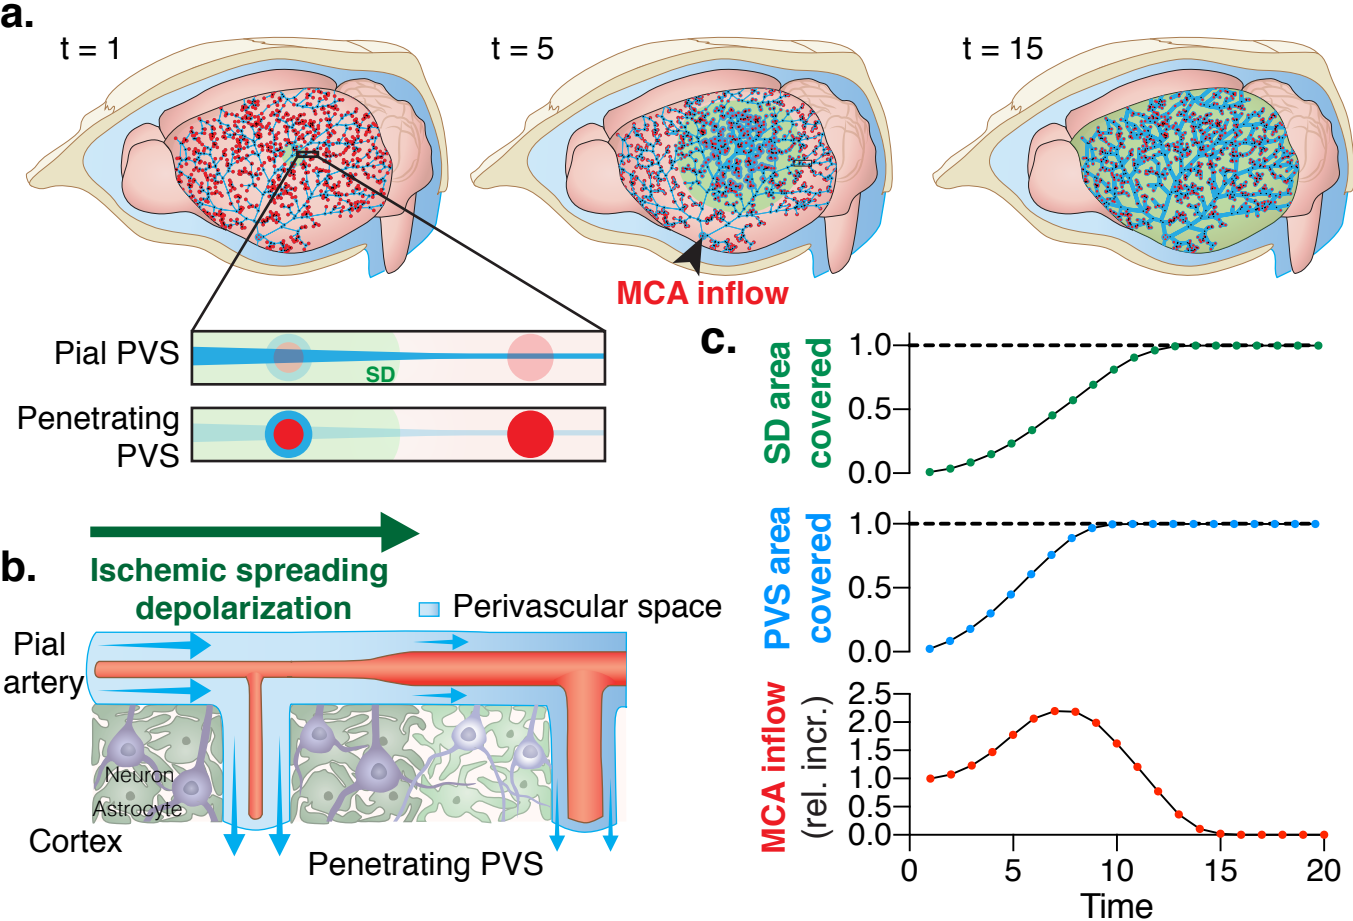

Supplement: NIHMS1599846-supplement-Fig__5.pdf [file NIHMS1599846-supplement-Fig__5.pdf]

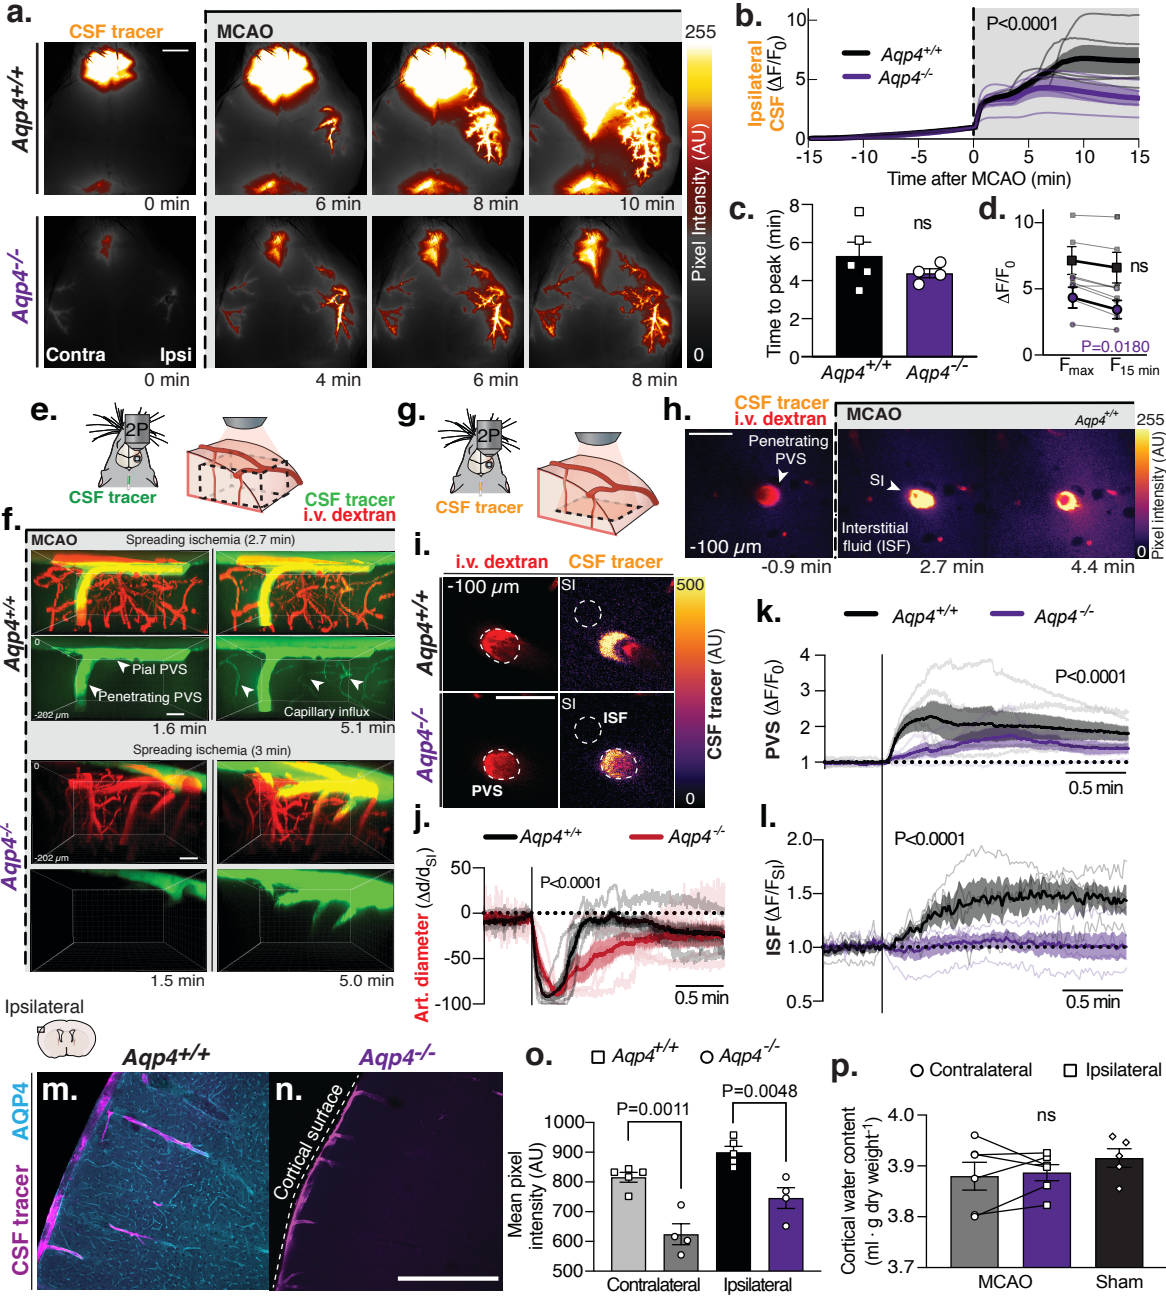

Supplement: NIHMS1599846-supplement-Fig__6.pdf [file NIHMS1599846-supplement-Fig__6.pdf]
